# Supplementary material for: Discovery of Human-Similar Gene Fusions in Canine Cancers
Source: Oxford University Press journal article supplement (doi:10.1158/0008-5472.can-16-2691), 2017-09-07
Supplement: 00085472can162691-sup-171198_4_supp_4221877_jjvkj5.docx [file 00085472can162691-sup-171198_4_supp_4221877_jjvkj5.docx]

ENSP00000288602/1-766 MAALSGGGGGGAEPGQALFNGDMEPEAGAGAGAAASSAADPAIPEEVWNIKQMIKLTQEH ENSCAFP00000005842/1-761 ---------------------------------------------QVWNIKQMIKLTQEH

:**************

ENSP00000288602/1-766 IEALLDKFGGEHNPPSIYLEAYEEYTSKLDALQQREQQLLESLGNGTDFSVSSSASMDTV ENSCAFP00000005842/1-761 IEALLDKFGGEHNPPSIYLEAYEEYTSKLDALQQREQQLLESLGNGTDFSVSSSASTDTV

******************************************************** ***

ENSP00000288602/1-766 TSSSSSSLSVLPSSLSVFQNPTDVARSNPKSPQKPIVRVFLPNKQRTVVPARCGVTVRDS ENSCAFP00000005842/1-761 TSSSSSSLSVLPSSLSVFQNPTDISRSNPKSPQKPIVRVFLPNKQRTVVPARCGVTVRDS ***********************::***********************************

ENSP00000288602/1-766 LKKALMMRGLIPECCAVYRIQDGEKKPIGWDTDISWLTGEELHVEVLENVPLTTHNFVRK ENSCAFP00000005842/1-761 LKKALMMRGLIPECCAVYRIQDGEKKPIGWDTDISWLTGEELHVEVLENVPLTTHNFVRK ************************************************************

ENSP00000288602/1-766 TFFTLAFCDFCRKLLFQGFRCQTCGYKFHQRCSTEVPLMCVNYDQLDLLFVSKFFEHHPI ENSCAFP00000005842/1-761 TFFTLAFCDFCRKLLFQGFRCQTCGYKFHQRCSTEVPLMCVNYDQLDLLFVSKFFEHHPI ************************************************************

ENSP00000288602/1-766 PQEEASLAETALTSGSSPSAPASDSIGPQILTSPSPSKSIPIPQPFRPADEDHRNQFGQR ENSCAFP00000005842/1-761 PQEEASIAETALTSGSSPSAPPSDSPGPPILTSPSPSKSIPIPQPFRPADEDHRNQFGQR ******:**************.*** ** *******************************

↓

ENSP00000288602/1-766 DRSSSAPNVHINTIEPVNID|DLIRDQGFRGDG---------------------------- ENSCAFP00000005842/1-761 DRSSSAPNVHINTIEPVNID|DLIRDQGFRSDGAPLNHLMRCLRKCQSRTPSPLLHSVPSE ********************|*********.**

ENSP00000288602/1-766 ------------GSTTGLSATPPASLPGSLTNVKALQKSPGPQRERKSSSSSEDRNRMKT ENSCAFP00000005842/1-761 IVFDFEPGPVFRGSTTGLSATPPASLPGSLTNVKALQKSPGPQRERKSSSSSEDRNRMKT ************************************************

ENSP00000288602/1-766 LGRRDSSDDWEIPDGQITVGQRIGSGSFGTVYKGKWHGDVAVKMLNVTAPTPQQLQAFKN ENSCAFP00000005842/1-761 LGRRDSSDDWEIPDGQITVGQRIGSGSFGTVYKGKWHGDVAVKMLNVTAPTPQQLQAFKN ************************************************************

ENSP00000288602/1-766 EVGVLRKTRHVNILLFMGYSTKPQLAIVTQWCEGSSLYHHLHIIETKFEMIKLIDIARQT ENSCAFP00000005842/1-761 EVGVLRKTRHVNILLFMGYSTKPQLAIVTQWCEGSSLYHHLHIIETKFEMIKLIDIARQT ************************************************************

ENSP00000288602/1-766 AQGMDYLHAKSIIHRDLKSNNIFLHEDLTVKIGDFGLATVKSRWSGSHQFEQLSGSILWM ENSCAFP00000005842/1-761 AQGMDYLHAKSIIHRDLKSNNIFLHEDLTVKIGDFGLATVKSRWSGSHQFEQLSGSILWM ************************************************************

ENSP00000288602/1-766 APEVIRMQDKNPYSFQSDVYAFGIVLYELMTGQLPYSNINNRDQIIFMVGRGYLSPDLSK ENSCAFP00000005842/1-761 APEVIRMQDKNPYSFQSDVYAFGIVLYELMTGQLPYSNINNRDQIIFMVGRGYLSPDLSK ************************************************************

ENSP00000288602/1-766 VRSNCPKAMKRLMAECLKKKRDERPLFPQILASIELLARSLPKIHRSASEPSLNRAGFQT ENSCAFP00000005842/1-761 VRSNCPKAMKRLMAECLKKKRDERPLFPQILASIELLARSLPKIHRSASEPSLNRAGFQT ************************************************************

ENSP00000288602/1-766 EDFSLYACASPKTPIQAGGYGAFPVH

ENSCAFP00000005842/1-761 EDFSLYACASPKTPIQAGGYGAFPVH

**************************

Supplementary Figure 4: Alignment of the human and canine BRAF proteins from Ensembl (http://www.ensembl.org/). Amino acids resulting from the transcription and translation of different exons are alternatively in black or blue. The Raf-like Ras-binding domain, involved in auto-inhibition, is indicated in yellow. The region coding this domain is conserved in the canine *BRAF* gene and lost in the glioma canine fusion. ↓ breakpoint.
