# Supplementary material for: Discovery of Human-Similar Gene Fusions in Canine Cancers
Source: Oxford University Press journal article supplement (doi:10.1158/0008-5472.can-16-2691), 2017-09-07
Supplement: 00085472can162691-sup-171198_4_supp_4221881_bbvkb6.docx [file 00085472can162691-sup-171198_4_supp_4221881_bbvkb6.docx]

↓

ENSP00000330382/1-241 MNRCWALFLSLCCYLRLVSAE|GDPIPEELYEMLSDHSIRSFDDLQRLLHGDPGEEDGAEL ENSCAFP00000001945/1-241 MNRCWALFLSLCCYLRLVSAE|GDPIPEELYEMLSDHSIRSFDDLQRLLHGASVDEDGAEL

*********************|***************************** . :******

ENSP00000330382/1-241 DLNMTRSHSGGELESLARGRRSLGSLTIAEPAMIAECKTRTEVFEISRRLIDRTNANFLV ENSCAFP00000001945/1-241 DLNLTRSHSGDELESLSRGRRSLGSPTVAEPAMIAECKTRTEVFEISRRLIDRTNANFLV

***:******.*****:******** *:********************************

ENSP00000330382/1-241 WPPCVEVQRCSGCCNNRNVQCRPTQVQLRPVQVRKIEIVRKKPIFKKATVTLEDHLACKC ENSCAFP00000001945/1-241 WPPCVEVQRCSGCCNNRNVQCRPTQVQLRPVQVRKIEIVRKKPTFKKATVTLEDHLACKC

******************************************* ****************

ENSP00000330382/1-241 ETVAAARPVTRSPGGSQEQRAKTPQTRVTIRTVRVRRPPKGKHRKFKHTHDKTALKETLG ENSCAFP00000001945/1-241 ETVVAARPVTRTPGSSQDLRAKTPQTRVTIRTVRVRRPPKGKHRKFKHTHDKKALKETLG

***.*******:**.**: *********************************.*******

ENSP00000330382/1-241 A

ENSCAFP00000001945/1-241 A

*

Supplementary Figure 2: Alignment of the human and canine PDGFB proteins from Ensembl (http://www.ensembl.org/). Amino acid resulting from the transcription and translation of different exons are alternatively in black or blue. The proteolytic cleavage sites of human PDGFB occur at residues RGRR81 and ARPVT190 (in yellow). These sites, coded by respectively exons 3 and 6, are conserved in canine *PDGFB* exons and present in the DFSP-like canine fusion. ↓ breakpoint.
